# Supplementary material for: Self-Reporting Photodynamic Nanobody Conjugate for Precise and Sustainable Large-Volume Tumor Treatment
Source: Research Square preprint supplement (doi:10.21203/rs.3.rs-3598991/v1), 2023-11-20
Supplement: Supplementary file 1 [file a1e1b962ec992a825651e5a6.pdf]

Corresponding author(s): Jiangli Fan

Last updated by author(s): Nov 16, 2023

## Reporting Summary

Nature Portfolio wishes to improve the reproducibility of the work that we publish. This form provides structure for consistency and transparency in reporting. For further information on Nature Portfolio policies, see our [Editorial Policies](#) and the [Editorial Policy Checklist](#).

### Statistics

For all statistical analyses, confirm that the following items are present in the figure legend, table legend, main text, or Methods section.

n/a Confirmed

- ☐ ☒ The exact sample size ( $n$ ) for each experimental group/condition, given as a discrete number and unit of measurement
- ☐ ☒ A statement on whether measurements were taken from distinct samples or whether the same sample was measured repeatedly
- ☐ ☒ The statistical test(s) used AND whether they are one- or two-sided  
*Only common tests should be described solely by name; describe more complex techniques in the Methods section.*
- ☐ ☒ A description of all covariates tested
- ☐ ☒ A description of any assumptions or corrections, such as tests of normality and adjustment for multiple comparisons
- ☐ ☒ A full description of the statistical parameters including central tendency (e.g. means) or other basic estimates (e.g. regression coefficient) AND variation (e.g. standard deviation) or associated estimates of uncertainty (e.g. confidence intervals)
- ☐ ☒ For null hypothesis testing, the test statistic (e.g.  $F$ ,  $t$ ,  $r$ ) with confidence intervals, effect sizes, degrees of freedom and  $P$  value noted  
*Give  $P$  values as exact values whenever suitable.*
- ☒ ☐ For Bayesian analysis, information on the choice of priors and Markov chain Monte Carlo settings
- ☒ ☐ For hierarchical and complex designs, identification of the appropriate level for tests and full reporting of outcomes
- ☐ ☒ Estimates of effect sizes (e.g. Cohen's  $d$ , Pearson's  $r$ ), indicating how they were calculated

Our web collection on [statistics for biologists](#) contains articles on many of the points above.

### Software and code

Policy information about [availability of computer code](#)

#### Data collection

The nuclear magnetic resonance of all compounds were detected by Bruker Avance II 500 MHz spectrometer; UV-vis-NIR spectra were performed on Agilent 8453 UV-visible or Lambda 750S spectroscopy; Fluorescence images were obtained with a confocal laser scanning microscope (Olympus Fluoview FV3000); Cytotoxicity assays were analyzed by Thermo Varioskan™ LUX multifunctional microplate reader (USA); Flow cytometry was analyzed by Attune NxT Acoustic Focusing Cytometer; Small animals' fluorescence imaging was carried out by NightOWL II LB983 living imaging system.

#### Data analysis

The resonance data was analyzed by MestRenova software; The statistical analysis was performed with Origin 2021 software (OriginLab, Northampton, MA); The fluorescence images statistical analysis was performed with Olympus FV3000 software; Student's  $t$  test was used to evaluate the statistical significance.

For manuscripts utilizing custom algorithms or software that are central to the research but not yet described in published literature, software must be made available to editors and reviewers. We strongly encourage code deposition in a community repository (e.g. GitHub). See the Nature Portfolio [guidelines for submitting code & software](#) for further information.

## Data

Policy information about [availability of data](#)

All manuscripts must include a [data availability statement](#). This statement should provide the following information, where applicable:

- Accession codes, unique identifiers, or web links for publicly available datasets
- A description of any restrictions on data availability
- For clinical datasets or third party data, please ensure that the statement adheres to our [policy](#)

All the data supporting the findings of this study are available within the article and its supplementary information files and from the corresponding author upon reasonable request.

## Research involving human participants, their data, or biological material

Policy information about studies with [human participants or human data](#). See also policy information about [sex, gender \(identity/presentation\), and sexual orientation](#) and [race, ethnicity and racism](#).

Reporting on sex and gender

Reporting on race, ethnicity, or other socially relevant groupings

Population characteristics

Recruitment

Ethics oversight

Note that full information on the approval of the study protocol must also be provided in the manuscript.

## Field-specific reporting

Please select the one below that is the best fit for your research. If you are not sure, read the appropriate sections before making your selection.

☒ Life sciences ☐ Behavioural & social sciences ☐ Ecological, evolutionary & environmental sciences

For a reference copy of the document with all sections, see [nature.com/documents/nr-reporting-summary-flat.pdf](https://www.nature.com/documents/nr-reporting-summary-flat.pdf)

## Life sciences study design

All studies must disclose on these points even when the disclosure is negative.

Sample size

Data exclusions

Replication

Randomization

Blinding

## Reporting for specific materials, systems and methods

We require information from authors about some types of materials, experimental systems and methods used in many studies. Here, indicate whether each material, system or method listed is relevant to your study. If you are not sure if a list item applies to your research, read the appropriate section before selecting a response.

## Materials &amp; experimental systems

|                                     |                                                                 |
|-------------------------------------|-----------------------------------------------------------------|
| n/a                                 | Involved in the study                                           |
| <input type="checkbox"/>            | <input checked="" type="checkbox"/> Antibodies                  |
| <input type="checkbox"/>            | <input checked="" type="checkbox"/> Eukaryotic cell lines       |
| <input checked="" type="checkbox"/> | <input type="checkbox"/> Palaeontology and archaeology          |
| <input type="checkbox"/>            | <input checked="" type="checkbox"/> Animals and other organisms |
| <input checked="" type="checkbox"/> | <input type="checkbox"/> Clinical data                          |
| <input checked="" type="checkbox"/> | <input type="checkbox"/> Dual use research of concern           |
| <input checked="" type="checkbox"/> | <input type="checkbox"/> Plants                                 |

## Methods

|                                     |                                                    |
|-------------------------------------|----------------------------------------------------|
| n/a                                 | Involved in the study                              |
| <input checked="" type="checkbox"/> | <input type="checkbox"/> ChIP-seq                  |
| <input type="checkbox"/>            | <input checked="" type="checkbox"/> Flow cytometry |
| <input checked="" type="checkbox"/> | <input type="checkbox"/> MRI-based neuroimaging    |

## Antibodies

|                 |                                                                                                                                                                                                                                                                                                                                                                                              |
|-----------------|----------------------------------------------------------------------------------------------------------------------------------------------------------------------------------------------------------------------------------------------------------------------------------------------------------------------------------------------------------------------------------------------|
| Antibodies used | In this work, a modified Anti-Human EGFR (7D12) nanobody was used for targeting the epidermal growth factor receptor of cells. This nanobody was prepared by the method in our previous work. Protein sequences:<br>AEFQVKLEESGGGVSQVQTGGSLRLTCAASGRTSRSYGMGWFQAPGKEREFVSGISWRGDSTGYADSVKGRFTISRDNKNTVDLQMNSLKPEDTAIYYC<br>AAAAGSAWYGTLYEYDWGQGTQ VTVSSEPKTPKPQPQPQPQPQPNTTEHHHHHHGGGSLCTPSR |
| Validation      | The molecular weight of this nanobody was verified by mass spectrometry, and related validation could be find in the reference.<br>DOI:10.1039/c9cy01856e; 10.1002/adfm.202103629.                                                                                                                                                                                                           |

## Eukaryotic cell lines

Policy information about [cell lines and Sex and Gender in Research](#)

|                                                                      |                                                                                                           |
|----------------------------------------------------------------------|-----------------------------------------------------------------------------------------------------------|
| Cell line source(s)                                                  | epidermoid carcinoma (A431), cervical carcinoma (HeLa), lung cancer (A549) and embryonic cells (NIH-3T3). |
| Authentication                                                       | Short Tandem Repeat identification is correct according to report by supplier.                            |
| Mycoplasma contamination                                             | No mycoplasma contamination was detected according to report by supplier.                                 |
| Commonly misidentified lines<br>(See <a href="#">ICLAC</a> register) | None.                                                                                                     |

## Animals and other research organisms

Policy information about [studies involving animals](#); [ARRIVE guidelines](#) recommended for reporting animal research, and [Sex and Gender in Research](#)

|                         |                                                                                                                                                                                                                                                                                                                                                    |
|-------------------------|----------------------------------------------------------------------------------------------------------------------------------------------------------------------------------------------------------------------------------------------------------------------------------------------------------------------------------------------------|
| Laboratory animals      | C57BL/6 mice, 6-7 weeks old.                                                                                                                                                                                                                                                                                                                       |
| Wild animals            | No wild animals were used.                                                                                                                                                                                                                                                                                                                         |
| Reporting on sex        | Sex was not considered in study design. All mice used in the study are female.                                                                                                                                                                                                                                                                     |
| Field-collected samples | None.                                                                                                                                                                                                                                                                                                                                              |
| Ethics oversight        | Our research complies with all relevant ethical regulations. All animal studies were performed in accordance with ARRIVE guidelines. All animal experiments were approved by the animal research ethics committee of Dalian University of Technology. The animal study complied with relevant ethical regulations for animal testing and research. |

Note that full information on the approval of the study protocol must also be provided in the manuscript.

## Plants

|                       |                                                 |
|-----------------------|-------------------------------------------------|
| Seed stocks           | No plant study are involved in this manuscript. |
| Novel plant genotypes | No plant study are involved in this manuscript. |
| Authentication        | No plant study are involved in this manuscript. |

## Plots

Confirm that:

- ☒ The axis labels state the marker and fluorochrome used (e.g. CD4-FITC).
- ☒ The axis scales are clearly visible. Include numbers along axes only for bottom left plot of group (a 'group' is an analysis of identical markers).
- ☒ All plots are contour plots with outliers or pseudocolor plots.
- ☒ A numerical value for number of cells or percentage (with statistics) is provided.

## Methodology

Sample preparation

Different cells (100000) planted in 6-well plate were incubated with 100 nM of MNB-Pyra Nbs for 2 h and treated with or without light irradiation (630 nm, 30mW/cm<sup>2</sup>, 20 min), followed by digestion and washing with PBS. Cells were then resuspended in PBS (200 µl) for test.

Instrument

Attune™ NxT flow cytometer (ThermoFisher Scientific)

Software

FlowJo\_V10

Cell population abundance

At least 10000 cells were selected for fluorescence intensity statistics

Gating strategy

Cells without the incubation of MNB-Pyra Nbs were selected as negative control. The cells incubated with MNB-Pyra Nbs were positive experimental groups.

☐ Tick this box to confirm that a figure exemplifying the gating strategy is provided in the Supplementary Information.
